# Supplementary material
Source: PubMed Central journal article supplement (PMC3289156)

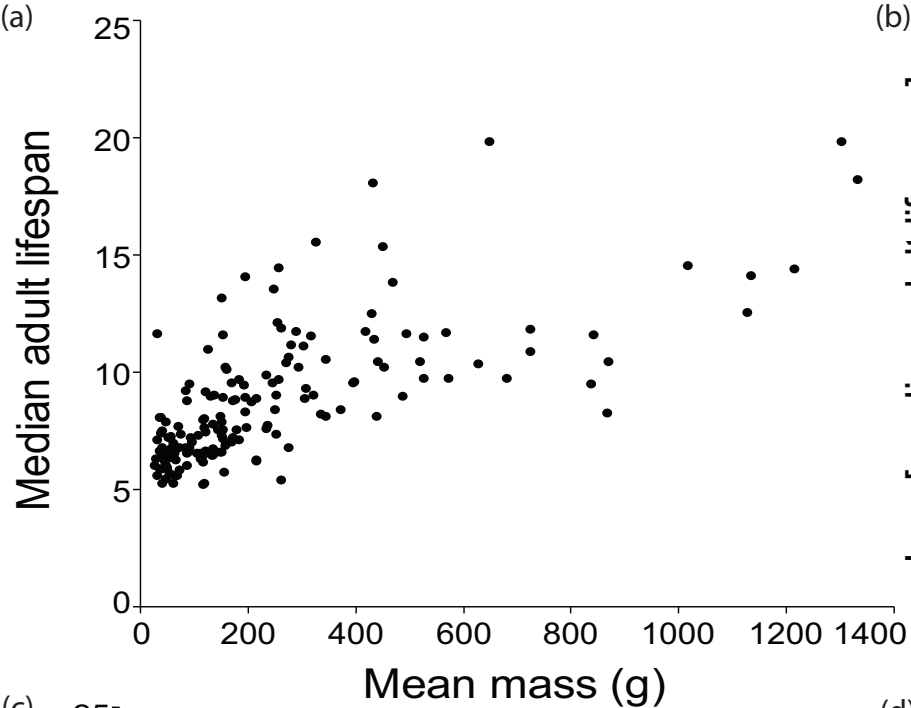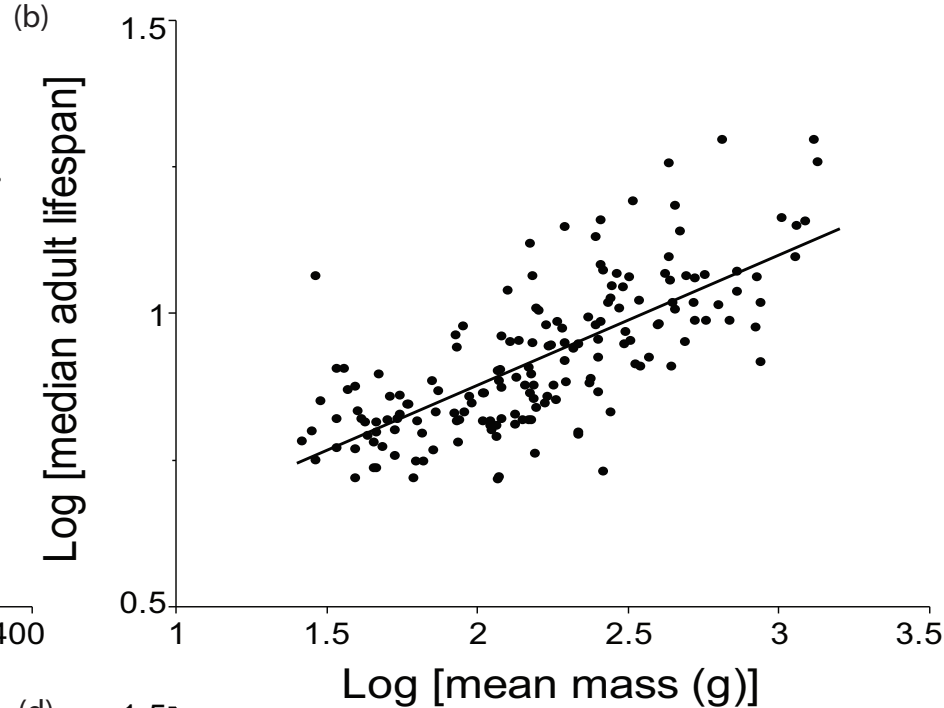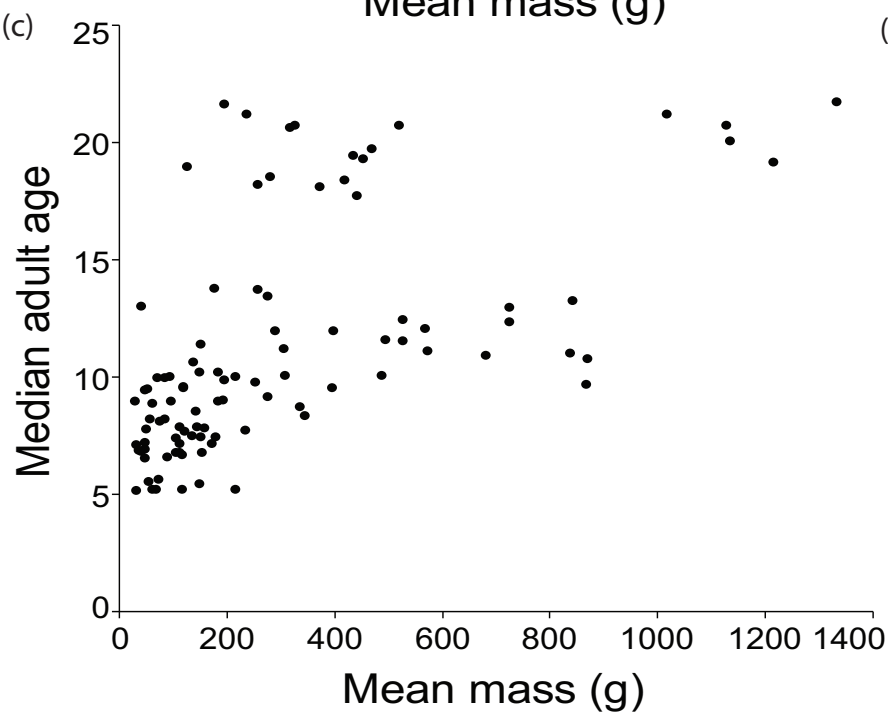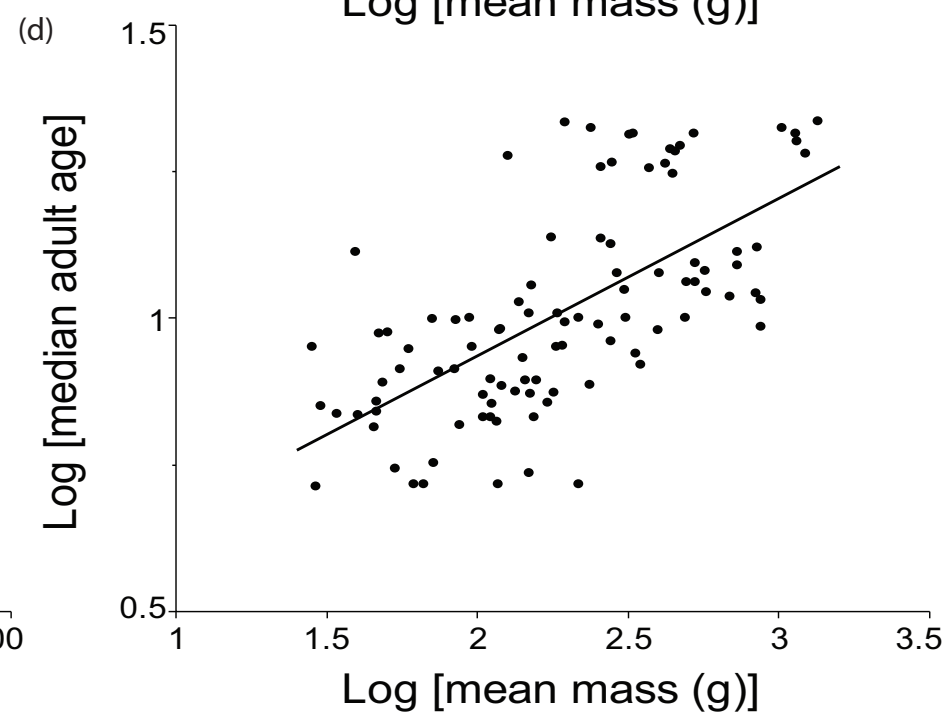

Supplement: NIHMS306660-supplement-Supp_Fig_S1.pdf [file NIHMS306660-supplement-Supp_Fig_S1.pdf]

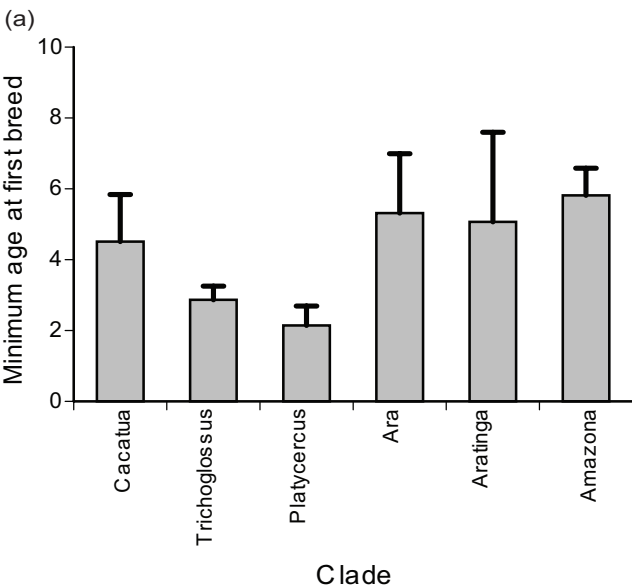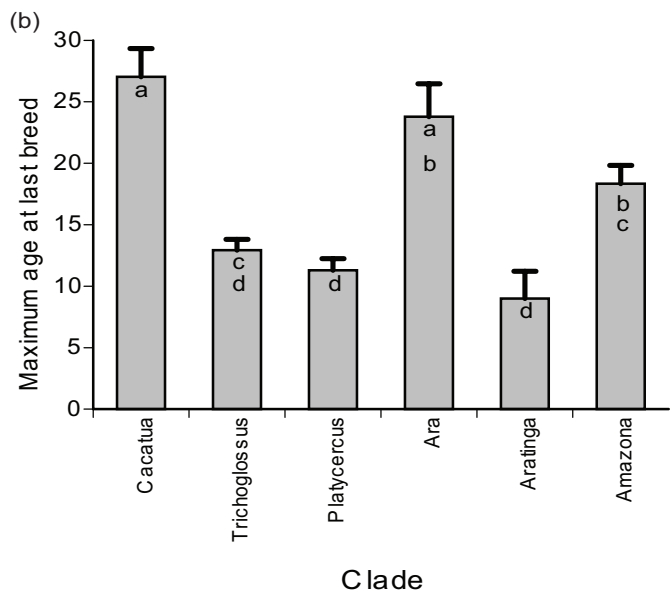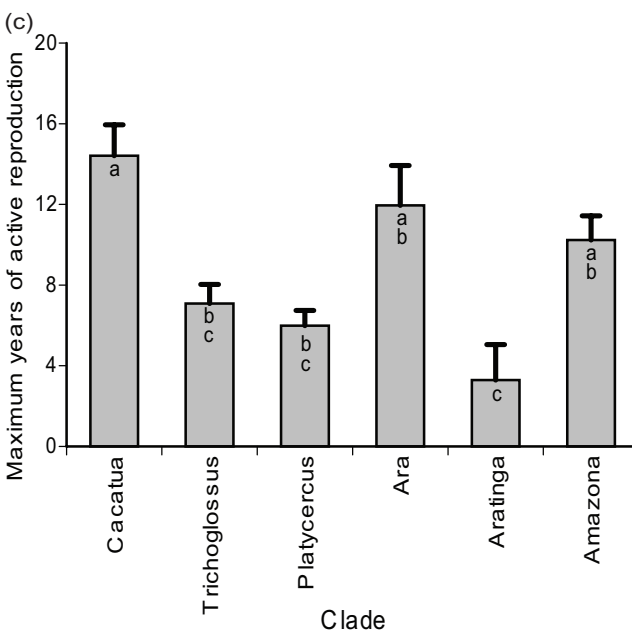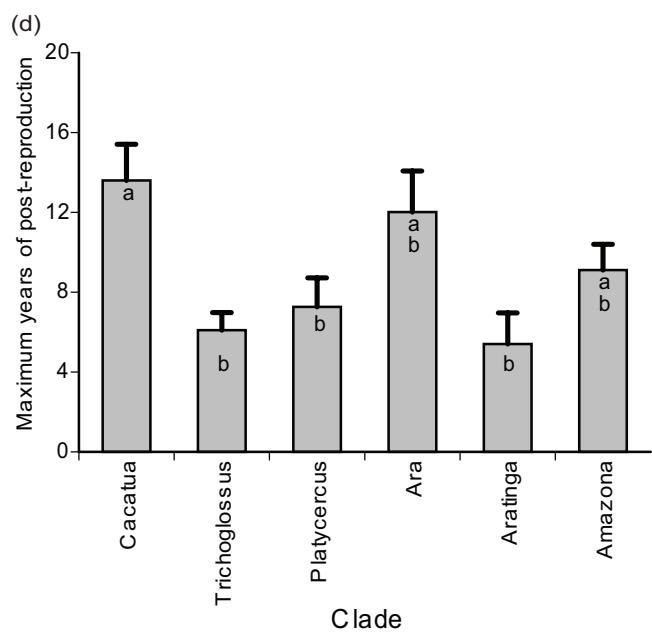

Supplement: NIHMS306660-supplement-Supp_Fig_S2.pdf [file NIHMS306660-supplement-Supp_Fig_S2.pdf]

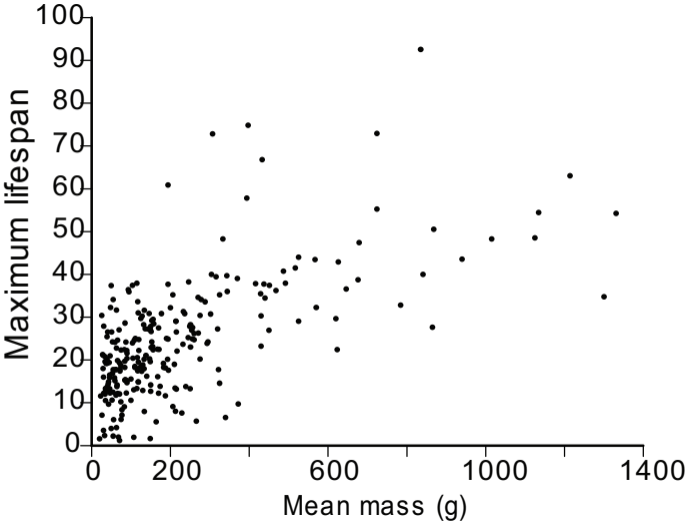

Supplement: NIHMS306660-supplement-Supp_Fig_S3.pdf [file NIHMS306660-supplement-Supp_Fig_S3.pdf]
